# Supplementary material
Source: Springer Nature journal article supplement (https://www.springermedizin.de/resource/supplementary/13052_2009_30_MOESM2_ESM.pdf/9671244)

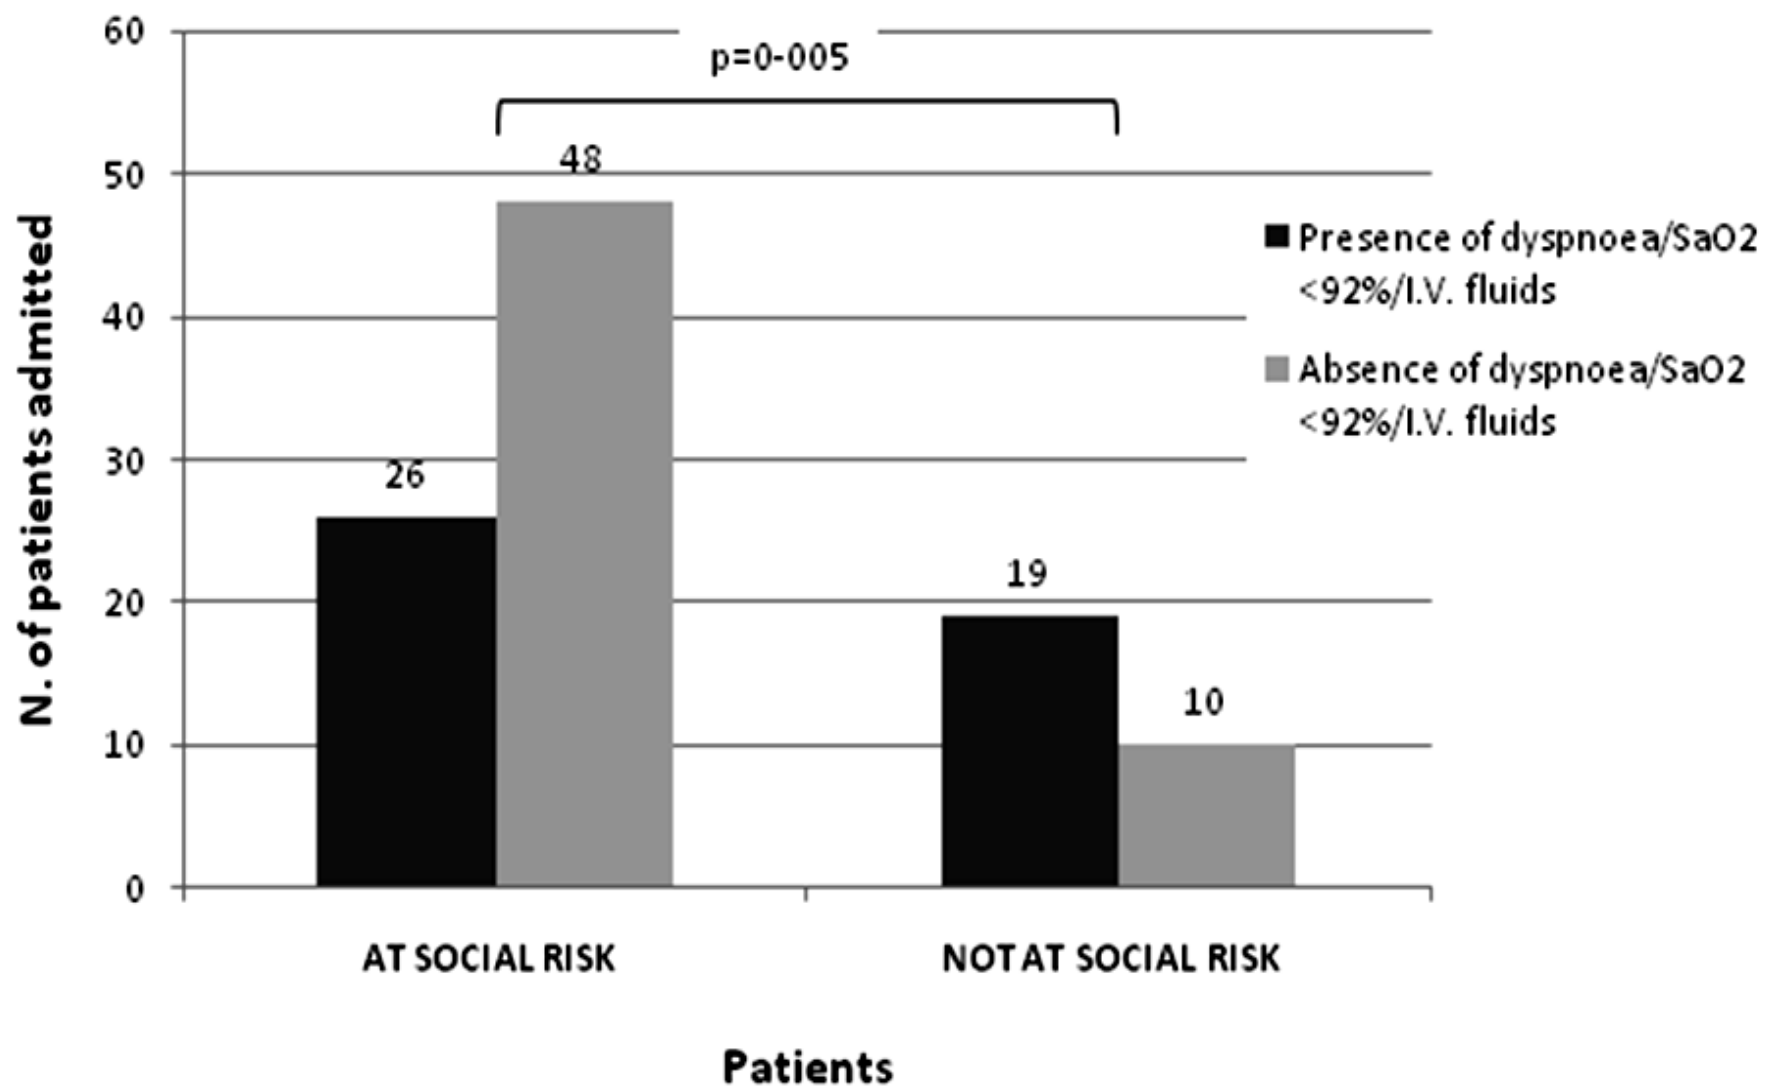

Supplement: MOESM2 [file 9671244]
